# Supplementary material
Source: PubMed Central journal article supplement (PMC2638424)
Supplement: djn214_2.pdf [file djn214_2.pdf]

Evaluation of Cyclin A1, MMPs and VEGF in Prostate cancer and Benign

| Patient # | Cancer    |     |     |      |         |         |           |      |     |      |         |         | Benign    |      |     |      |           |           |      |     |      |  |
|-----------|-----------|-----|-----|------|---------|---------|-----------|------|-----|------|---------|---------|-----------|------|-----|------|-----------|-----------|------|-----|------|--|
|           | a1        | nmp | veg | nmp2 | Gleason | Gleason | a1        | mmp9 | veg | nmp2 | Gleason | Gleason | a1        | mmp9 | veg | mmp2 | Patient # | a1        | mmp9 | veg | mmp2 |  |
|           | Block1(a) |     |     |      |         |         | Block1(b) |      |     |      |         |         | Block2(a) |      |     |      |           | Block2(b) |      |     |      |  |
| 1         | 3         | 3   | 2   | 3    | 3       | 3       | 3         | 1    | 2   | 3    | 3       | 3       | 3         | 0    | 2   | 3    | 1         | 3         | 2    | 2   | 3    |  |
| 2         |           |     |     |      | 3       | 3       |           |      |     |      |         |         |           |      |     |      | 2         |           |      |     |      |  |
| 3         | 1         | 1   |     | 0    | 3       | 3       | 1         | 2    | 1   | 0    |         |         | 2         | 1    | 1   | 1    | 3         |           |      |     | 1    |  |
| 4         |           |     |     |      | 3       | 3       |           | 0    |     | 0    | 3       | 3       |           |      |     | 0    | 4         |           |      |     | 0    |  |
| 5         | 0         | 0   | 1   | 1    | 3       | 3       |           |      |     | 0    |         |         | 0         |      |     | 0    | 5         | 0         |      |     | 0    |  |
| 6         | 2         | 2   | 3   | 0    |         |         | 2         | 2    | 3   | 0    | 3       | 3       | 2         | 1    | 1   | 0    | 6         | 1         | 1    | 1   | 0    |  |
| 7         | 1         | 1   | 1   | 1    | 4       | 3       | 1         | 1    | 2   | 2    |         |         | 1         | 0    | 1   | 0    | 7         | 1         | 0    | 1   | 0    |  |
| 8         | 1         | 2   | 1   | 1    |         |         | 1         | 2    | 1   | 1    | 4       | 4       |           | 1    |     |      | 8         |           |      |     |      |  |
| 9         |           |     |     |      | 3       | 3       |           |      |     |      | 3       | 4       |           |      |     | 0    | 9         |           |      | 0   | 1    |  |
| 10        | 3         | 2   | 2   | 0    | 3       | 4       | 2         | 1    | 2   | 1    | 3       | 4       | 3         | 1    | 2   | 1    | 10        | 2         | 1    | 2   | 0    |  |
| 11        |           |     |     |      | 3       | 3       |           |      |     |      | 3       | 3       | 0         |      |     | 0    | 11        | 0         | 1    | 1   | 0    |  |
| 12        | 2         | 1   | 2   | 2    | 4       | 3       | 1         | 1    | 1   | 2    | 3       | 4       | 1         | 1    | 1   | 0    | 12        | 0         | 0    | 1   | 0    |  |
| 13        | 3         | 3   | 2   | 3    | 4       | 4       | 3         | 2    | 3   | 3    | 4       | 4       |           | 0    |     |      | 13        | 2         | 1    | 1   | 3    |  |
| 14        | 2         | 2   | 1   | 3    | 4       | 4       | 1         | 2    | 2   | 3    | 4       | 4       | 0         | 0    |     | 1    | 14        | 0         | 1    |     | 1    |  |
| 15        | 3         | 3   | 3   | 3    | 3       | 3       | 3         | 1    | 2   | 3    |         |         |           |      |     |      | 15        | 3         | 2    | 3   | 0    |  |
| 16        | 0         |     | 1   | 1    |         |         | 0         |      |     |      |         |         | 2         | 1    | 2   | 0    | 16        | 2         | 2    |     | 0    |  |
| 17        | 3         | 2   | 3   | 3    | 3       | 3       | 3         | 1    | 3   | 1    | 3       | 3       | 2         | 1    | 2   | 1    | 17        | 2         | 2    | 2   | 1    |  |
| 18        | 2         | 0   |     | 2    | 3       | 4       |           | 1    |     | 3    | 4       | 4       | 1         | 1    | 1   | 3    | 18        | 1         | 0    | 1   | 2    |  |
| 19        | 1         | 1   | 3   | 0    | 3       | 3       | 1         | 0    | 2   | 1    | 2       | 3       |           |      |     |      | 19        |           |      |     |      |  |
| 20        | 0         | 0   | 1   | 2    | 5       | 4       | 1         | 0    | 1   | 0    | 4       | 4       | 2         | 1    | 1   | 1    | 20        |           |      |     |      |  |
| 21        | 3         | 1   | 3   | 1    | 3       | 4       | 3         | 1    | 3   | 0    | 3       | 3       | 2         | 1    | 2   | 3    | 21        | 2         | 1    | 2   | 3    |  |
| 22        |           |     |     |      | 3       | 3       |           |      |     |      | 3       | 3       |           |      |     |      | 22        |           |      |     |      |  |
| 23        | 2         | 0   | 2   | 1    |         |         | 2         | 1    | 1   | 0    | 4       | 4       | 1         | 1    | 1   | 3    | 23        | 2         | 1    | 1   | 2    |  |
| 24        |           |     |     |      |         |         |           |      |     |      |         |         | 1         | 1    | 1   | 0    | 24        | 1         | 1    | 1   | 2    |  |
| 25        | 2         | 1   | 2   | 0    | 3       | 3       | 2         | 1    | 2   | 1    | 3       | 3       | 1         | 2    | 1   | 2    | 25        |           |      |     |      |  |
| 26        | 2         | 2   | 3   | 2    | 3       |         |           |      |     |      |         |         | 1         | 1    | 1   | 2    | 26        | 1         | 2    | 1   | 0    |  |
| 27        | 1         | 1   | 1   | 1    | 3       | 3       | 1         | 1    | 1   | 1    | 3       | 3       | 1         | 1    | 1   | 0    | 27        | 1         | 0    | 1   | 1    |  |
| 28        | 2         | 2   | 2   | 3    | 3       | 3       | 2         | 1    | 1   | 3    |         |         | 0         |      |     | 1    | 28        | 1         | 0    | 1   | 0    |  |
| 29        | 0         |     | 1   | 3    | 4       | 4       | 0         |      | 1   | 1    | 4       | 3       |           |      |     |      | 29        | 2         | 1    | 1   | 0    |  |
| 30        | 3         | 3   | 2   | 3    |         |         |           |      | 1   |      | 3       | 3       | 2         | 0    | 1   | 3    | 30        | 2         | 1    | 2   | 0    |  |
| 31        | 2         | 1   | 1   | 2    |         |         | 2         | 2    | 1   | 2    |         |         | 1         | 1    | 1   | 0    | 31        | 1         | 1    | 1   | 0    |  |
| 32        | 0         |     | 0   | 2    | 4       | 3       |           |      |     | 1    | 3       | 4       | 1         | 0    | 1   | 0    | 32        | 1         | 1    | 1   | 0    |  |
| 33        | 0         | 1   | 1   |      | 5       | 4       | 0         |      | 1   | 0    | 5       | 4       | 1         | 1    | 1   | 0    | 33        | 0         | 1    | 1   | 1    |  |
| 34        | 1         | 1   | 1   | 0    |         |         | 1         | 0    | 1   | 0    | 2       | 2       | 1         | 1    | 0   | 1    | 34        | 2         | 1    | 1   | 2    |  |
| 35        | 0         | 1   | 1   | 1    |         |         | 1         | 1    | 1   | 2    |         |         | 1         | 1    | 1   | 0    | 35        | 1         | 1    | 1   | 1    |  |
| 36        | 0         | 0   | 1   | 0    |         |         | 1         | 1    | 1   | 0    |         |         | 1         | 1    | 1   | 1    | 36        | 0         | 0    | 1   | 1    |  |
| 37        | 1         | 1   | 1   | 2    | 4       | 3       | 1         | 1    | 1   | 2    | 3       | 3       | 0         | 0    | 1   | 2    | 37        | 1         | 1    | 1   | 1    |  |
| 38        | 1         | 0   | 1   | 1    |         |         | 1         | 0    | 1   | 1    | 4       | 4       | 0         | 0    | 1   | 0    | 38        | 1         | 1    |     | 0    |  |
| 39        | 2         | 1   | 2   | 1    | 3       | 3       | 2         | 1    | 1   | 1    |         |         | 1         | 1    | 1   | 1    | 39        | 1         | 1    | 1   | 1    |  |
| 40        |           |     |     |      | 3       | 3       |           |      |     |      | 3       | 3       | 1         |      | 1   | 2    | 40        |           |      |     |      |  |

















|     |   |   |   |   |   |   |   |   |   |   |   |   |   |   |   |   |     |   |   |   |   |
|-----|---|---|---|---|---|---|---|---|---|---|---|---|---|---|---|---|-----|---|---|---|---|
| 356 | 3 | 1 | 3 |   | 3 | 3 | 2 | 1 | 1 |   | 3 | 3 | 2 | 1 | 2 | 0 | 356 | 2 | 0 | 1 | 0 |
| 357 | 2 | 1 | 2 |   | 3 | 3 | 3 | 1 | 2 |   | 3 | 3 | 2 | 1 | 2 | 1 | 357 | 2 | 0 | 1 | 1 |
| 358 | 1 | 0 | 1 | 0 | 3 | 4 | 1 | 0 | 1 | 0 | 3 | 4 | 2 | 1 | 1 | 1 | 358 | 1 | 1 | 1 | 0 |
| 359 | 2 | 2 | 2 | 1 |   | 3 | 2 | 2 | 2 | 0 | 3 | 3 | 0 | 1 |   | 0 | 359 | 1 | 1 | 1 | 1 |
| 360 | 2 | 2 | 2 | 1 | 3 | 3 | 2 | 2 | 1 | 2 | 3 | 3 | 2 | 1 | 1 | 2 | 360 | 1 | 2 | 1 | 2 |
| 361 | 1 |   | 1 | 2 | 4 | 3 | 2 | 1 | 1 | 3 | 4 | 3 | 0 | 1 |   |   | 361 | 1 | 2 | 1 | 1 |
| 362 | 1 | 2 | 1 | 0 | 3 | 3 | 1 | 2 | 1 | 0 | 3 | 3 | 2 | 2 | 1 | 1 | 362 | 2 | 2 | 1 | 1 |
| 363 | 1 | 0 | 1 | 0 | 3 | 3 | 1 | 1 | 1 | 0 | 3 | 3 | 2 | 2 | 2 | 0 | 363 | 3 | 2 | 2 | 0 |
| 364 | 2 | 2 | 1 | 2 |   |   | 2 | 2 | 1 | 1 |   |   | 2 | 1 | 1 | 1 | 364 | 2 | 2 | 1 | 1 |
| 365 |   |   |   |   |   |   |   |   |   |   |   |   | 1 | 0 | 0 | 0 | 365 | 1 | 0 | 0 | 0 |
| 366 | 2 | 1 | 2 | 1 |   | 4 | 3 | 1 | 2 | 2 | 3 | 4 |   |   |   |   | 366 |   |   |   |   |
| 367 |   |   |   |   |   |   |   |   |   |   |   |   | 2 | 1 | 2 | 0 | 367 | 3 | 1 | 2 | 0 |
| 368 | 2 | 1 | 2 |   | 3 | 3 | 2 | 1 | 2 | 0 | 3 | 3 | 1 | 1 | 2 | 1 | 368 | 1 | 1 | 1 | 1 |
| 369 | 3 | 1 | 2 | 1 | 3 |   | 2 | 2 | 1 | 1 |   |   | 2 | 1 | 1 | 0 | 369 | 3 | 1 | 2 | 1 |
| 370 | 1 | 2 | 2 | 1 | 4 | 3 | 1 | 2 | 2 | 0 | 4 | 3 | 2 | 2 | 2 | 0 | 370 | 2 | 2 | 1 | 0 |
| 371 | 2 | 1 | 1 | 2 | 4 |   | 2 | 1 | 1 | 1 |   |   | 2 | 1 | 2 | 0 | 371 | 1 | 1 | 1 | 1 |
| 372 | 1 | 1 | 1 | 0 | 3 | 4 | 2 | 0 | 1 | 2 | 4 | 4 | 2 | 1 | 1 | 2 | 372 | 1 | 1 | 1 | 0 |
| 373 | 1 | 2 | 1 | 0 |   | 4 | 1 | 2 | 1 | 0 | 4 | 4 | 2 | 2 | 1 | 2 | 373 | 2 | 2 | 1 | 2 |
| 374 | 2 | 1 | 2 | 1 | 3 | 4 | 2 | 2 | 1 | 1 | 3 | 4 | 3 | 2 | 1 | 2 | 374 | 2 | 1 | 1 | 1 |
| 375 | 2 | 3 | 2 | 2 | 3 | 3 | 2 | 2 | 2 | 1 | 3 | 3 | 1 | 1 | 1 | 0 | 375 | 0 |   |   |   |
| 376 | 3 | 2 | 3 | 1 |   |   | 3 | 2 | 3 | 0 |   |   | 1 | 2 | 2 | 0 | 376 | 2 | 2 | 1 | 0 |
| 377 | 2 | 2 | 2 | 1 |   |   | 2 | 2 | 1 | 1 |   |   | 0 | 0 |   | 1 | 377 | 1 | 1 | 1 | 2 |
| 378 | 1 | 1 | 1 | 2 | 3 |   | 2 | 1 | 2 | 1 |   |   | 1 | 1 | 1 | 1 | 378 | 1 | 1 | 1 | 0 |
| 379 | 2 | 1 | 2 | 1 | 3 |   | 2 | 1 | 1 | 1 |   |   | 2 | 1 | 2 | 1 | 379 | 2 | 1 | 1 |   |
| 380 | 3 | 1 | 2 | 1 |   | 3 | 3 | 1 | 2 | 0 | 3 | 3 |   |   |   |   | 380 |   |   |   |   |
| 381 | 2 | 1 | 1 | 1 |   |   | 1 | 1 | 1 | 0 |   |   | 1 | 1 | 1 | 0 | 381 | 2 | 2 | 2 | 0 |
| 382 | 2 | 1 | 1 | 0 |   |   | 1 | 2 | 1 | 0 |   |   | 1 |   | 1 | 2 | 382 |   |   |   |   |
| 383 | 2 | 1 | 1 | 0 | 3 | 3 | 2 | 1 | 1 | 0 | 4 | 3 | 0 | 1 |   |   | 383 | 0 | 1 |   |   |
| 384 | 1 | 1 | 1 | 0 | 3 | 3 | 1 | 2 | 1 | 0 | 3 | 3 | 1 | 1 | 1 | 1 | 384 | 1 |   | 1 | 0 |
| 385 | 3 | 3 | 2 | 2 |   | 4 | 3 | 3 | 2 | 3 | 3 | 4 | 1 | 1 | 1 | 1 | 385 | 1 | 1 | 1 | 0 |
| 386 | 2 | 1 | 1 | 0 | 3 | 3 | 2 | 1 | 1 | 0 | 3 | 3 | 1 | 0 | 1 | 1 | 386 | 1 | 0 | 1 | 1 |
| 387 | 1 |   |   |   |   |   | 1 | 0 |   |   |   |   | 2 | 0 | 1 | 2 | 387 | 1 | 0 | 1 | 2 |
| 388 | 3 | 2 | 1 | 1 |   |   | 1 | 2 | 1 | 0 |   |   | 1 | 0 | 1 | 1 | 388 | 2 | 1 | 1 | 1 |
| 389 | 1 | 1 | 1 | 1 | 3 | 4 | 2 | 0 | 1 | 1 | 3 | 4 | 1 | 0 | 1 | 0 | 389 | 1 | 1 | 1 | 1 |
| 390 | 2 | 2 | 2 | 0 | 3 | 4 | 2 | 2 | 1 | 0 | 3 | 4 | 0 | 0 |   |   | 390 | 2 | 2 | 2 | 1 |
| 391 |   |   |   |   |   |   | 3 | 2 | 2 | 1 |   |   | 1 | 0 | 0 | 1 | 391 | 1 | 0 |   |   |
| 392 | 1 | 2 | 1 | 2 | 3 | 3 | 2 | 2 | 2 | 1 | 3 | 3 | 2 | 1 | 1 | 1 | 392 |   |   |   |   |
| 393 | 3 | 2 | 2 | 0 | 4 | 3 | 3 | 2 | 3 | 2 | 3 | 3 |   |   |   |   | 393 |   |   |   |   |
| 394 | 1 | 0 | 1 | 0 | 3 | 3 | 1 | 1 | 1 | 0 | 3 | 3 | 1 | 1 | 1 | 1 | 394 | 1 | 2 | 1 | 0 |
| 395 | 1 | 1 | 1 | 2 | 4 | 5 | 1 | 1 | 1 | 2 | 4 | 4 | 1 | 1 | 1 | 2 | 395 | 1 | 1 | 1 | 1 |
| 396 | 2 | 1 | 2 | 2 | 3 | 4 | 3 | 1 | 2 | 1 | 3 | 4 | 1 | 1 | 1 | 0 | 396 | 1 | 1 | 1 | 1 |
| 397 | 3 | 1 | 2 | 1 | 3 | 4 | 3 | 1 | 2 | 0 | 3 | 4 | 1 | 0 | 1 | 0 | 397 | 2 | 1 | 1 | 0 |
| 398 | 0 | 0 | 3 | 1 | 3 | 3 | 2 | 0 | 2 | 1 | 3 | 3 | 3 | 0 |   |   | 398 | 2 | 0 | 1 | 0 |
| 399 | 2 | 2 | 1 | 0 |   |   | 2 | 1 | 1 | 0 |   |   | 2 | 1 | 1 | 0 | 399 | 2 | 2 | 2 | 0 |
| 400 | 1 | 1 | 1 | 0 | 3 | 4 | 1 | 1 | 1 | 0 | 3 | 4 | 1 | 0 | 1 | 3 | 400 | 1 | 0 | 1 | 0 |

|     |   |   |   |   |   |   |   |   |   |   |   |   |   |   |   |   |     |   |   |   |   |
|-----|---|---|---|---|---|---|---|---|---|---|---|---|---|---|---|---|-----|---|---|---|---|
| 401 |   |   |   |   | 3 | 3 | 3 | 1 | 1 | 0 | 3 | 3 | 1 | 1 | 1 | 0 | 401 | 1 | 0 | 1 | 0 |
| 402 | 2 | 1 | 1 | 0 | 3 | 3 | 2 | 2 | 1 | 0 | 3 | 3 | 1 | 1 | 1 | 1 | 402 | 1 | 1 | 1 | 0 |
| 403 | 2 | 2 | 1 | 3 | 3 | 3 | 2 | 2 | 2 | 1 | 3 | 3 | 1 | 1 | 0 | 0 | 403 | 2 | 2 | 1 | 0 |
| 404 | 2 | 1 | 2 | 0 | 3 | 3 | 2 | 2 | 3 | 0 | 3 | 3 | 3 | 3 | 2 | 0 | 404 | 2 | 3 | 2 | 0 |
| 405 | 3 | 1 | 2 | 2 | 3 | 3 | 3 | 1 | 2 | 1 | 4 | 3 | 2 | 1 | 1 | 0 | 405 | 1 | 1 | 1 | 0 |
| 406 | 2 | 2 | 1 | 0 |   |   | 3 | 2 | 2 | 1 |   |   | 2 | 1 | 2 | 0 | 406 | 2 | 1 | 2 | 0 |
| 407 | 3 | 2 | 2 | 2 | 4 | 3 | 3 | 1 | 3 | 3 | 4 | 3 | 1 | 1 | 1 | 1 | 407 | 2 | 1 | 1 | 3 |
| 408 | 2 | 0 | 2 | 1 | 3 | 3 | 2 | 1 | 2 | 1 | 3 | 3 | 1 | 1 | 1 | 1 | 408 | 2 | 1 | 1 | 1 |
| 409 | 2 | 2 | 2 | 2 |   |   | 2 | 1 | 2 | 1 |   |   | 2 | 2 | 1 | 0 | 409 | 2 | 1 | 2 | 0 |
| 410 | 1 | 1 | 2 | 2 |   | 3 | 2 | 1 | 1 | 2 | 4 | 3 | 1 | 1 | 1 | 0 | 410 | 1 | 1 | 1 | 0 |
| 411 | 2 | 2 | 2 | 1 | 3 | 4 | 3 | 2 | 2 | 1 | 3 | 4 | 1 | 1 | 1 | 1 | 411 | 2 | 1 | 1 | 2 |
| 412 | 2 | 1 | 2 | 1 | 4 | 4 | 2 | 0 | 2 | 1 | 4 | 4 | 0 | 0 |   |   | 412 | 2 | 2 | 1 | 0 |
| 413 | 2 | 1 | 1 | 2 | 3 | 3 | 1 | 2 | 1 | 2 | 3 | 3 | 1 | 1 | 1 | 1 | 413 | 1 | 1 | 1 | 1 |
| 414 | 3 | 1 | 3 | 1 | 3 | 3 | 3 | 1 | 3 | 0 | 3 | 3 |   | 2 | 2 | 1 | 414 | 1 | 2 | 1 | 0 |
| 415 | 2 | 2 | 1 | 0 | 4 | 4 | 2 | 1 | 1 | 0 | 4 | 4 | 2 | 2 | 2 | 1 | 415 | 2 | 2 | 2 | 1 |
| 416 |   |   |   |   |   |   |   |   |   |   |   |   | 1 | 0 |   |   | 416 |   |   |   |   |
| 417 | 1 |   | 2 |   |   |   | 1 | 0 |   |   |   |   | 1 | 0 | 0 |   | 417 | 1 | 0 |   |   |
| 418 | 3 | 0 | 3 |   | 3 | 3 | 3 | 1 | 3 |   | 3 | 3 | 2 | 1 | 1 |   | 418 | 2 | 1 | 1 |   |
| 419 | 3 | 2 | 2 |   | 3 | 3 | 3 | 2 | 2 |   | 3 | 3 | 1 | 1 | 1 |   | 419 |   |   |   |   |
| 420 | 3 | 2 | 2 |   | 3 | 3 | 3 | 2 | 2 |   | 3 | 3 | 1 | 1 | 1 |   | 420 | 2 | 2 | 2 |   |
| 421 | 2 | 2 | 1 |   | 3 | 4 | 2 | 2 | 2 |   | 3 | 4 | 1 | 2 | 2 |   | 421 | 2 | 1 | 1 |   |
| 422 |   |   |   |   | 4 | 3 | 2 | 1 |   |   | 4 | 3 |   |   |   |   | 422 |   |   |   |   |
| 423 | 3 | 2 | 3 |   | 3 | 4 | 3 | 2 | 2 |   | 3 | 4 | 2 | 1 | 1 |   | 423 |   |   | 1 |   |
| 424 | 1 | 1 | 1 |   |   |   | 1 | 1 | 1 |   |   |   | 2 | 0 | 2 |   | 424 | 1 | 1 |   |   |
| 425 | 2 | 3 | 2 |   |   |   |   |   | 2 |   |   |   |   |   |   |   | 425 | 2 | 2 | 2 |   |
| 426 | 2 | 1 | 2 |   | 3 | 3 | 2 | 1 | 3 |   | 4 | 3 | 2 | 1 | 2 |   | 426 |   | 0 |   |   |
| 427 | 0 |   |   |   |   |   | 0 |   |   |   |   |   | 1 | 0 | 1 |   | 427 | 1 | 0 | 1 |   |
| 428 | 2 | 2 | 3 |   | 3 | 3 | 2 | 1 | 2 |   | 3 | 3 | 1 | 1 | 1 |   | 428 | 2 | 1 | 1 |   |
| 429 | 0 | 0 | 0 |   |   |   | 3 | 1 | 2 |   |   |   | 2 | 1 | 2 |   | 429 | 2 | 1 | 2 |   |
| 430 | 3 | 2 | 1 |   | 3 | 3 | 3 | 3 | 3 |   | 3 | 3 | 1 | 1 | 1 |   | 430 | 2 | 2 | 1 |   |
| 431 | 2 | 1 | 1 |   | 3 | 3 | 2 | 1 | 1 |   | 3 | 3 | 2 | 2 | 1 |   | 431 | 2 | 1 | 1 |   |
| 432 | 3 | 2 | 2 |   | 3 | 4 | 3 | 2 | 2 |   | 3 | 4 | 1 | 0 | 1 |   | 432 | 1 | 1 | 1 |   |
| 433 | 3 | 2 | 2 |   | 3 | 3 | 3 | 2 | 2 |   | 3 | 3 | 1 | 2 | 1 |   | 433 | 1 | 2 | 1 |   |
| 434 | 2 | 2 | 2 |   | 3 | 3 | 1 | 1 | 1 |   | 3 | 3 | 2 | 2 | 1 |   | 434 | 1 | 1 | 1 |   |
| 435 | 2 | 2 | 3 |   | 3 | 3 | 2 | 2 | 2 |   | 3 | 3 | 2 | 2 | 2 |   | 435 | 2 | 1 | 2 |   |
| 436 | 3 | 2 | 2 |   | 3 | 3 | 2 | 1 | 3 |   | 4 | 3 | 1 | 2 | 2 |   | 436 | 2 | 2 | 2 |   |
| 437 | 2 | 1 | 2 |   | 4 | 4 | 3 | 2 | 3 |   | 4 | 4 | 2 | 1 | 2 |   | 437 | 1 | 1 | 1 |   |
| 438 | 2 | 2 | 1 |   |   |   | 2 | 1 | 2 |   |   |   | 2 | 2 | 2 |   | 438 |   |   |   |   |
| 439 | 2 | 1 | 2 |   | 3 | 3 | 2 | 1 | 2 |   | 3 | 3 | 1 | 1 | 2 |   | 439 | 2 | 1 | 3 |   |
| 440 | 2 | 1 | 1 |   |   | 3 | 2 | 1 | 2 |   | 3 | 3 | 1 | 0 | 1 |   | 440 | 1 | 0 | 1 |   |
| 441 | 3 | 2 | 2 |   | 3 | 3 | 2 | 1 | 1 |   | 3 | 3 | 1 | 0 | 2 |   | 441 | 3 | 2 | 3 |   |
| 442 | 1 | 1 | 1 |   |   |   | 1 | 1 | 1 |   |   |   | 3 | 2 | 2 |   | 442 | 1 | 1 | 1 |   |
| 443 | 3 | 2 | 2 |   |   |   | 2 | 2 | 2 |   |   |   | 2 | 1 | 2 |   | 443 | 1 | 1 | 1 |   |
| 444 | 2 | 2 | 2 |   |   |   | 3 | 2 | 2 |   |   |   |   |   |   |   | 444 |   |   |   |   |
| 445 | 2 | 2 | 2 |   | 3 | 4 | 3 | 2 | 3 |   | 3 | 4 |   |   |   |   | 445 |   |   |   |   |

|     |   |   |   |   |   |   |   |   |   |   |   |   |   |   |   |   |     |   |   |   |   |
|-----|---|---|---|---|---|---|---|---|---|---|---|---|---|---|---|---|-----|---|---|---|---|
| 446 | 2 | 2 | 2 | 0 | 3 | 3 | 2 | 2 | 2 | 0 | 3 | 3 | 1 | 0 | 1 | 0 | 446 | 1 | 1 | 1 | 0 |
| 447 | 1 | 1 | 1 | 0 | 3 |   | 1 | 1 | 1 | 1 |   |   | 1 | 1 | 1 | 1 | 447 | 2 | 1 | 1 | 1 |
| 448 | 2 | 1 | 2 | 0 | 3 | 3 | 3 | 1 | 1 | 0 | 3 | 3 | 3 | 2 | 2 | 0 | 448 | 3 | 2 | 2 | 1 |
| 449 | 1 | 1 | 1 | 1 |   | 3 | 2 | 1 | 1 | 1 | 3 | 3 | 0 | 1 |   |   | 449 | 1 | 0 | 1 | 0 |
| 450 | 2 | 2 | 1 | 0 |   |   | 2 | 2 | 1 | 0 |   |   | 1 | 1 | 1 | 1 | 450 | 2 | 2 | 2 | 2 |
| 451 | 2 | 1 | 2 | 0 | 4 | 4 | 2 | 2 | 2 | 0 | 4 | 4 | 0 |   |   |   | 451 | 2 | 1 | 1 | 0 |
| 452 | 1 | 1 | 1 | 0 | 3 | 3 | 2 | 2 | 1 | 0 | 3 | 3 | 1 | 1 | 1 | 0 | 452 | 1 | 2 | 1 | 0 |
| 453 | 3 | 2 | 2 | 0 |   | 3 | 3 | 2 | 1 | 1 | 3 | 3 | 2 | 2 | 1 | 0 | 453 | 2 | 2 | 2 | 0 |
| 454 | 2 | 1 | 1 | 1 |   |   | 1 | 2 | 1 | 0 |   |   | 1 | 1 | 1 | 0 | 454 | 1 | 1 | 1 | 0 |
| 455 | 2 | 1 | 2 | 0 | 3 | 3 | 2 | 0 | 1 | 0 | 3 | 3 | 1 | 1 | 1 | 0 | 455 | 2 | 1 | 1 | 1 |
| 456 | 2 | 1 | 2 | 3 | 3 | 3 | 1 | 1 | 1 | 2 | 3 | 3 | 1 | 1 | 1 | 1 | 456 | 1 | 1 | 1 | 0 |
| 457 | 1 | 0 | 1 | 2 | 4 | 4 | 1 | 1 | 1 | 1 | 3 | 4 | 3 | 1 | 3 | 0 | 457 | 3 | 1 | 2 | 0 |
| 458 | 1 | 2 | 2 | 1 | 3 | 3 | 1 | 1 | 2 | 1 | 3 | 3 | 2 | 1 | 2 | 1 | 458 |   | 0 |   |   |
| 459 | 2 | 2 | 1 | 0 |   | 3 | 2 | 2 | 2 | 0 | 3 | 3 | 1 | 1 | 1 | 0 | 459 | 1 | 2 | 1 | 1 |
| 460 | 2 | 1 | 2 | 2 | 3 | 4 | 3 | 2 | 2 | 2 | 3 | 4 | 2 | 1 | 1 | 1 | 460 | 1 | 1 | 1 | 1 |
| 461 | 1 | 1 | 1 | 0 |   |   | 2 | 2 | 1 | 0 |   |   | 2 | 1 | 2 | 2 | 461 | 1 | 1 | 1 | 0 |
| 462 | 2 | 2 | 2 | 1 | 3 | 3 | 3 | 2 | 2 | 1 | 3 | 3 | 1 | 0 | 1 | 0 | 462 | 1 | 1 | 1 | 0 |
| 463 | 2 | 2 | 3 | 0 | 3 | 4 | 2 | 2 | 3 | 0 | 3 | 4 | 1 | 2 | 1 | 0 | 463 | 2 | 2 | 1 | 0 |
| 464 | 3 | 3 | 3 | 0 | 3 | 3 |   |   | 2 |   | 3 | 3 | 1 | 2 | 1 | 0 | 464 | 1 | 1 | 1 | 0 |
| 465 | 3 | 3 | 2 | 1 | 3 | 3 | 3 | 3 | 2 | 0 | 3 | 3 | 3 | 1 | 1 | 1 | 465 | 3 | 3 | 2 | 1 |
| 466 | 3 | 1 | 2 | 3 | 3 | 4 | 2 | 1 | 2 | 3 | 3 | 4 | 2 | 1 | 2 | 3 | 466 | 1 | 1 | 1 | 3 |
| 467 | 3 | 1 | 2 | 0 | 4 | 3 | 2 | 1 | 2 | 1 | 3 | 3 | 1 | 1 | 1 | 0 | 467 | 2 | 1 | 1 | 0 |
| 468 | 1 | 1 | 2 | 0 | 3 |   | 1 | 0 | 1 | 0 |   |   | 1 | 1 | 1 | 2 | 468 | 2 | 1 | 1 | 3 |
| 469 | 2 | 1 | 2 | 2 | 3 |   | 3 | 1 | 2 | 3 |   |   | 1 | 0 | 1 |   | 469 | 1 | 0 | 1 |   |
| 470 | 2 | 0 | 1 | 0 | 4 | 4 | 1 | 0 | 2 | 0 | 4 | 4 | 1 | 0 | 1 | 2 | 470 | 1 | 1 | 1 | 2 |
| 471 | 2 | 1 | 1 | 0 |   | 3 | 2 | 1 | 1 | 2 | 3 | 3 | 2 | 0 | 2 | 2 | 471 | 2 | 1 | 2 | 0 |
| 472 | 2 | 1 | 2 | 2 | 4 | 4 | 2 | 1 | 2 | 0 | 4 | 4 | 2 | 1 | 2 | 0 | 472 | 1 | 1 | 1 | 1 |
| 473 | 2 | 1 | 3 | 0 | 2 | 3 | 3 | 1 | 3 | 0 | 2 | 3 | 1 | 1 | 1 | 1 | 473 | 2 | 1 | 1 | 1 |
| 474 | 3 | 1 | 2 | 1 | 3 | 4 | 3 | 1 | 2 | 0 | 3 | 4 | 1 |   | 1 |   | 474 | 2 | 1 |   | 1 |
| 475 | 3 | 1 | 2 | 0 | 3 | 4 | 3 | 1 | 2 | 1 | 3 | 4 | 2 | 1 | 1 | 1 | 475 | 1 | 1 | 1 | 0 |
| 476 | 2 | 1 | 1 | 0 |   |   | 2 | 1 | 1 | 0 |   |   | 1 | 0 | 1 | 1 | 476 | 2 | 1 | 1 | 0 |
| 477 | 3 | 2 | 2 | 0 | 3 | 4 | 2 | 3 | 2 | 1 | 3 | 4 | 2 | 1 | 1 | 0 | 477 | 1 | 1 | 1 | 0 |
| 478 | 2 | 2 | 1 | 0 | 4 | 4 | 2 | 1 | 1 | 1 | 3 | 4 | 3 |   | 2 | 1 | 478 | 3 | 1 | 2 | 1 |
| 479 | 3 | 1 | 2 | 1 | 3 | 3 | 3 | 1 | 2 | 0 | 3 | 3 | 2 | 2 | 1 | 0 | 479 | 3 | 2 | 1 | 2 |
| 480 | 3 | 1 | 3 | 0 | 3 | 3 | 3 | 1 | 3 | 1 | 3 | 3 | 3 | 1 | 2 | 0 | 480 |   | 1 |   | 0 |
| 481 | 1 | 1 | 1 | 0 | 4 | 4 | 1 | 1 | 1 | 0 | 4 | 4 | 2 | 1 | 1 | 0 | 481 | 2 | 1 | 1 | 0 |
| 482 | 3 | 1 | 2 | 1 | 3 | 3 | 3 | 2 | 2 | 2 | 3 | 3 | 3 | 2 | 1 | 2 | 482 | 3 |   | 1 |   |
